# Supplementary material for: Impact of cathodic pH and bioaugmentation on acetate and CH4 production in a microbial electrosynthesis cell
Source: Royal Society of Chemistry journal article supplement (doi:10.1039/d4ra03906h), 2024-01-01
Supplement: d4ra03906h1.pdf [file d4ra03906h1.pdf]

## Supplementary information

### S1. MES setup diagram

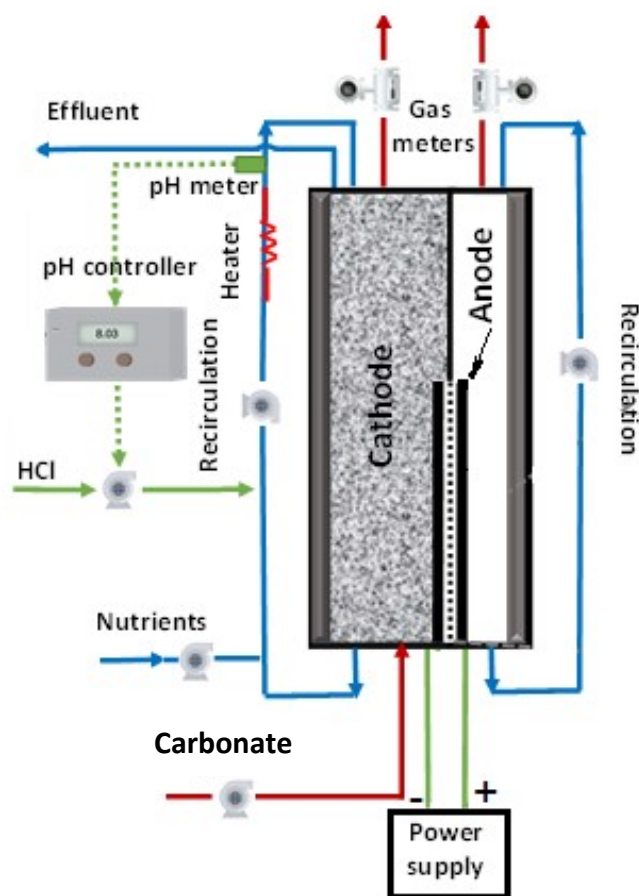

**Figure S1.** Schematic representation of a MES cell with continuous carbonate supply. The dotted line denotes PEM. Figure adapted from Gomez Vidales et al<sup>37</sup>.

## S2. Energy consumption and coulombic efficiency calculation

The energy consumption ( $E_{H_2}$ ), per litre of equivalent hydrogen ( $Wh L_{H_2}^{-1}$ ), and the Coulombic efficiency (CE) were determined as follows:

$$E_{H_2} = \frac{VIt}{\sum_i v_i Q_i} \quad (1)$$

$$CE (\%) = \frac{FN \sum_i n_i C_i}{\int_{t=0}^t Idt} 100, \quad (2)$$

where  $V$  is the voltage (V),  $I$  is the current (A), and  $t$  is the time (day).  $Q_i$  is the flow rate of cathodic products ( $L d^{-1}$ ),  $i$  is the cathodic product (i.e.,  $CH_4$ ,  $H_2$ , acetate), and  $v_i$  represents the stoichiometric amount of  $H_2$  necessary to form the given products ( $mol mol^{-1}$ ), which is 4 for both  $CH_4$  and acetate. For Equation. (2),  $F$  is the Faraday constant ( $96485 C mol^{-1}$ ), while  $N$  is the total amount of cathodic products (in mol),  $n_i$  defines the equivalent mole of electron required per mole of generated  $i$ -th product ( $n_i$  is 2 for  $H_2$  generation and 8 for  $CH_4$  and acetate), and  $C_i$  delineates the mole fraction of  $i$  in the product ( $mol mol^{-1}$ ).

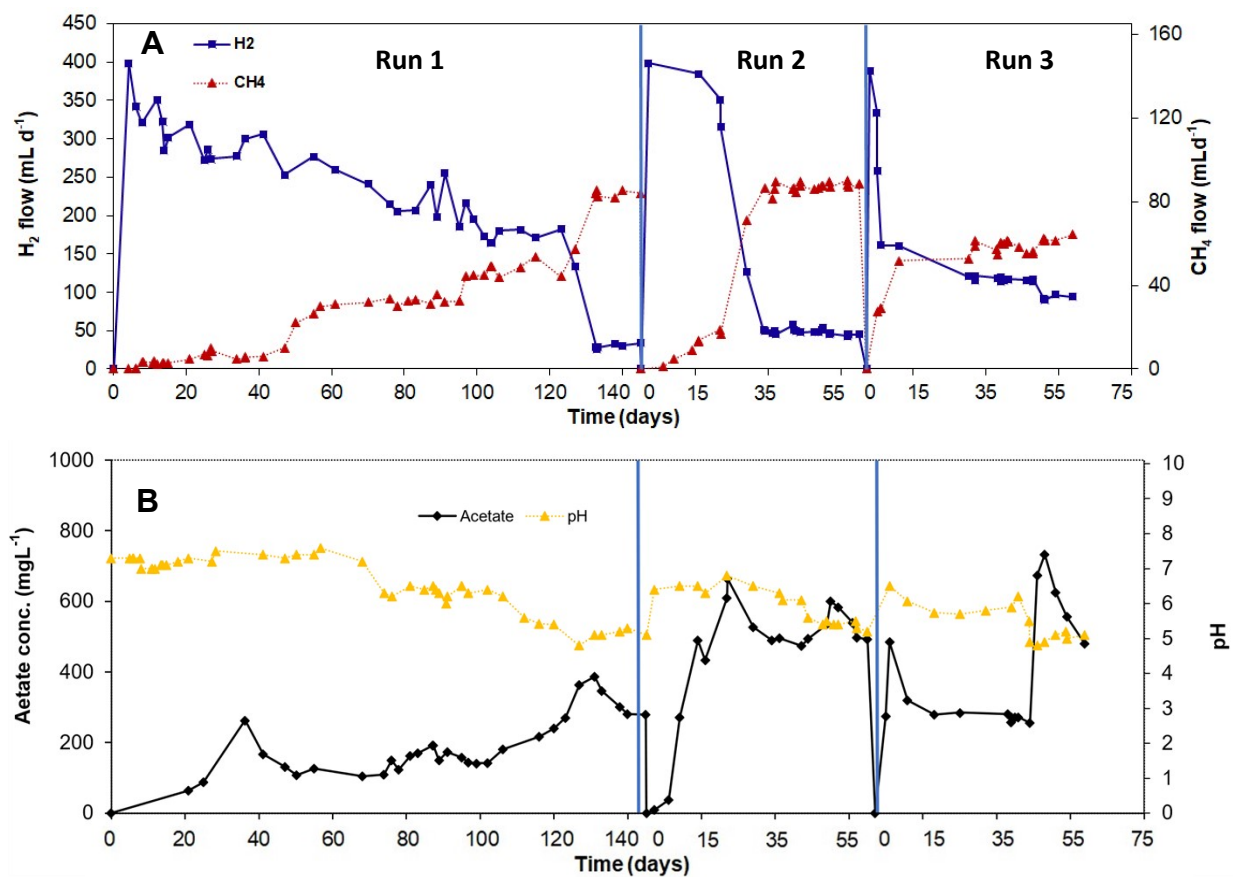

**Figure S2:** Time dependence of (A)  $\text{CH}_4$  and  $\text{H}_2$  production rate, (B) Acetate concentration and pH in the cathode compartment of MES-1 cell.

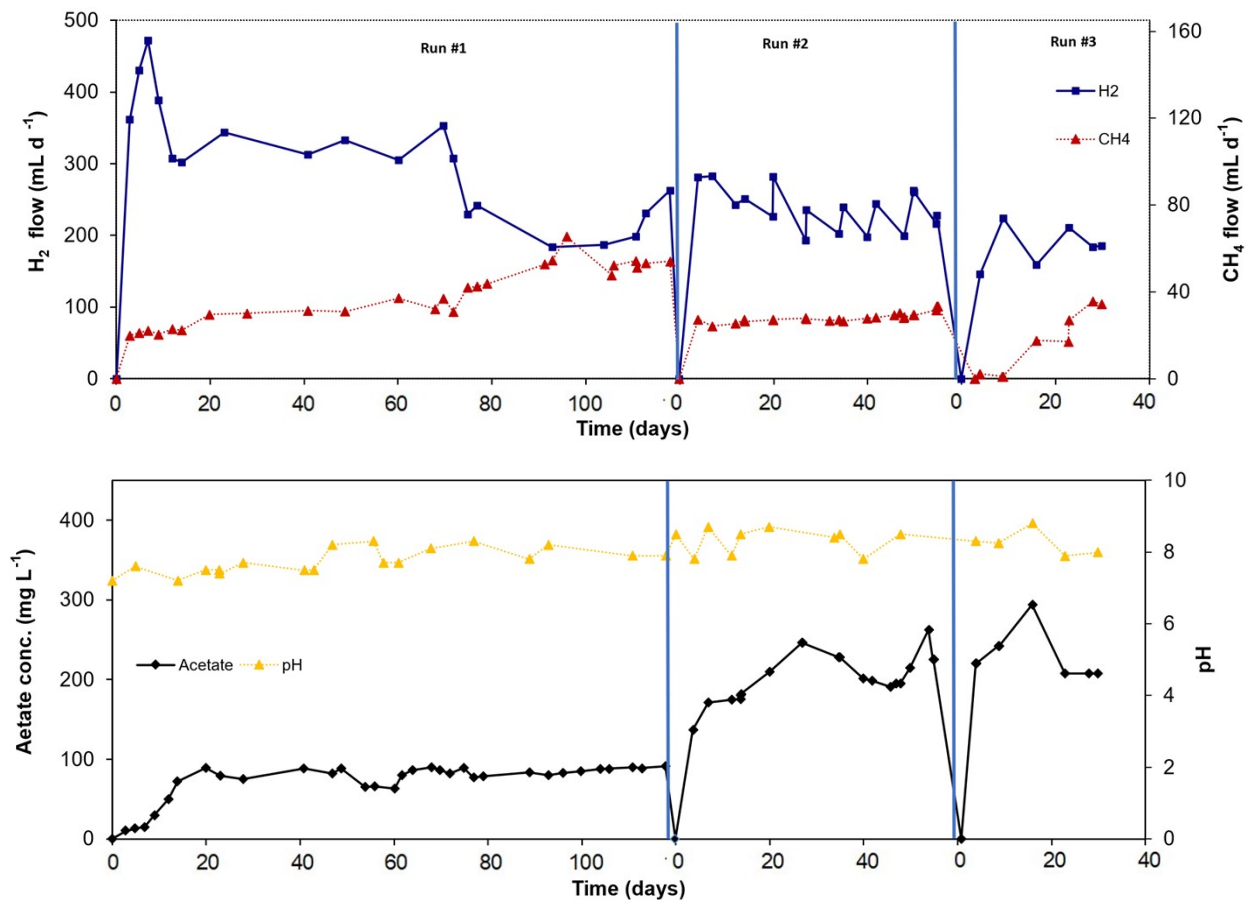

**Figure S3:** Time dependence of (A)  $\text{CH}_4$  and  $\text{H}_2$  production rate, (B) Acetate concentration and pH in the cathode compartment of MES-2 cell.
